# Supplementary material for: Phosphines with N-heterocyclic boranyl substituents
Source: Royal Society of Chemistry journal article supplement (doi:10.1039/c3dt52441h), 2013-10-03
Supplement: c3dt52441h.pdf [file c3dt52441h.pdf]

## Supporting Information

### Phosphines with N-heterocyclic boranyl substituents

M. Kaaz,<sup>a</sup> J. Bender,<sup>a</sup> D. Förster,<sup>a</sup> W. Frey,<sup>b</sup> M. Nieger<sup>c</sup> and D. Gudat<sup>a</sup>,

Contents:

**Figure S1**  $^{11}\text{B}\{^1\text{H}\}$  and  $^{31}\text{P}\{^1\text{H}\}$  NMR spectrum of **4a**

**Figure S2**  $^{11}\text{B}\{^1\text{H}\}$  and  $^{31}\text{P}\{^1\text{H}\}$  NMR spectrum of **4b**

**Figure S3**  $^{11}\text{B}\{^1\text{H}\}$  and  $^{31}\text{P}\{^1\text{H}\}$  NMR spectrum of **4c**

**Figure S4**  $^{11}\text{B}\{^1\text{H}\}$  and  $^{31}\text{P}\{^1\text{H}\}$  NMR spectrum of **4d**

**Figure S5**  $^{11}\text{B}\{^1\text{H}\}$  and  $^{31}\text{P}$  NMR spectrum of **4e**

**Figure S6**  $^{11}\text{B}\{^1\text{H}\}$  and  $^{31}\text{P}$  NMR spectrum of **4f**

**Figure S7** Graphical representation of the molecular structure of **11** in the crystal (triclinic, space group  $P1$ , cell parameters:  $a = 12.935(2)$  Å,  $b = 14.241(3)$  Å,  $c = 20.705(4)$  Å,  $\alpha = 93.713(8)^\circ$ ,  $\beta = 101.431(7)^\circ$ ,  $\gamma = 90.891(7)^\circ$ ) measured at 110(2) K. The two coordinating THF molecules are disordered.

**Figure S8** Graphical representation of the computed molecular structures of **4b** (left) and **4'** (right) obtained after energy optimization at the  $\omega\text{B97X-D/cc-pVDZ}$  level.

**Figure S9** Top: Overlay of the computed (red) and experimentally determined (blue) molecular structures of **4b** (top); bottom: overlay of the computed molecular structures of **4b** (red) and **4'** (blue). Computations were carried out at the  $\omega\text{B97X-D/cc-pVDZ}$  level.

**Table S1** Energy, vibrational zero-point energy, and atomic coordinates of the molecular structure of **4b** obtained after energy optimization at the  $\omega\text{B97X-D/cc-pVDZ}$  level.

**Table S1** Energy, vibrational zero-point energy, and atomic coordinates of the molecular structure of **4'** obtained after energy optimization at the  $\omega\text{B97X-D/cc-pVDZ}$  level.

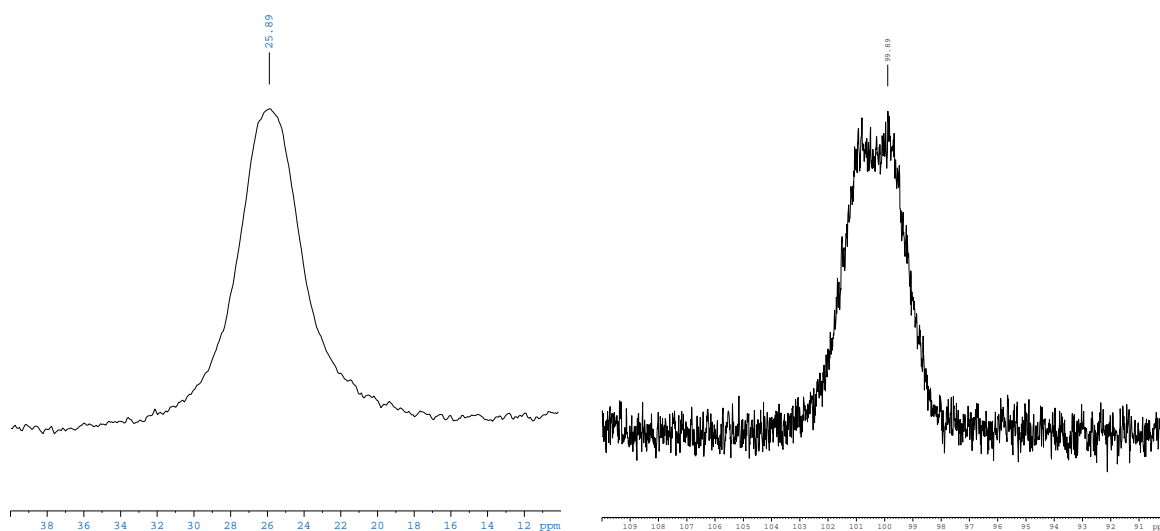

**Figure S1**  $^{11}\text{B}\{^1\text{H}\}$  (left) and  $^{31}\text{P}\{^1\text{H}\}$  NMR spectrum (right) of **4a**

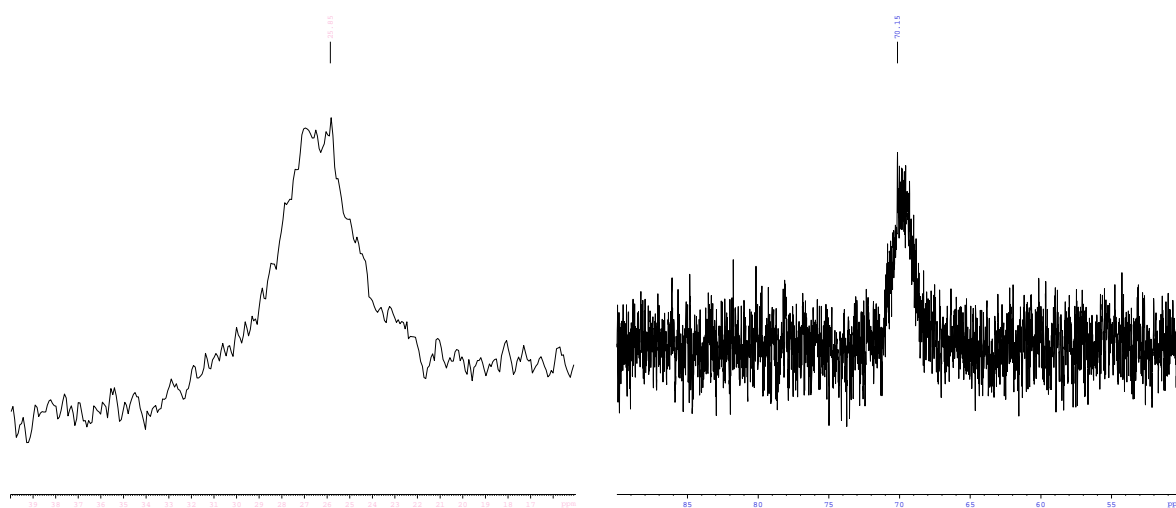

**Figure S2**  $^{11}\text{B}\{^1\text{H}\}$  (left) and  $^{31}\text{P}\{^1\text{H}\}$  NMR spectrum (right) of **4b**

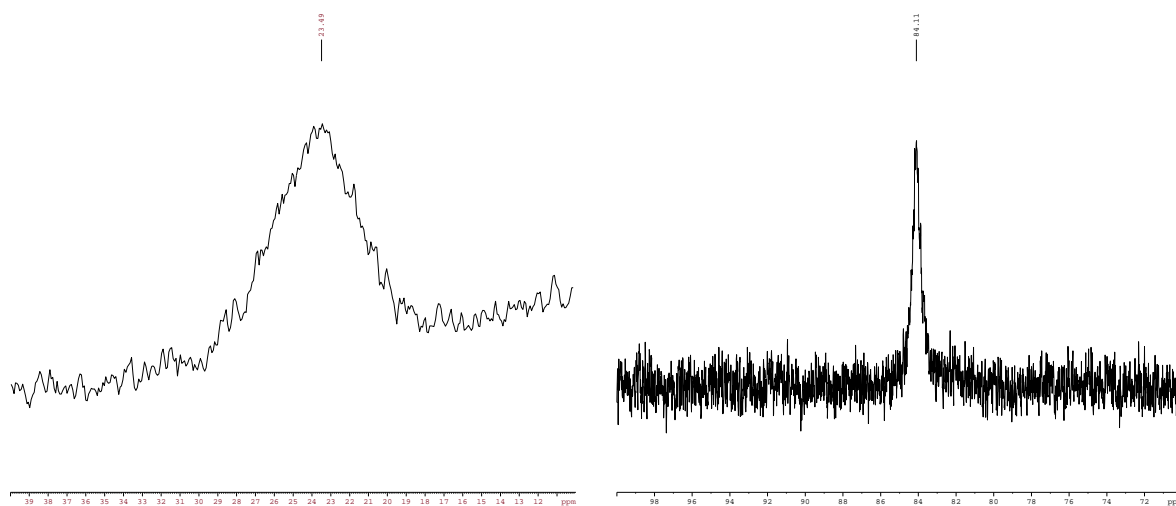

**Figure S3**  $^{11}\text{B}\{^1\text{H}\}$  (left) and  $^{31}\text{P}\{^1\text{H}\}$  NMR spectrum (right) of **4c**

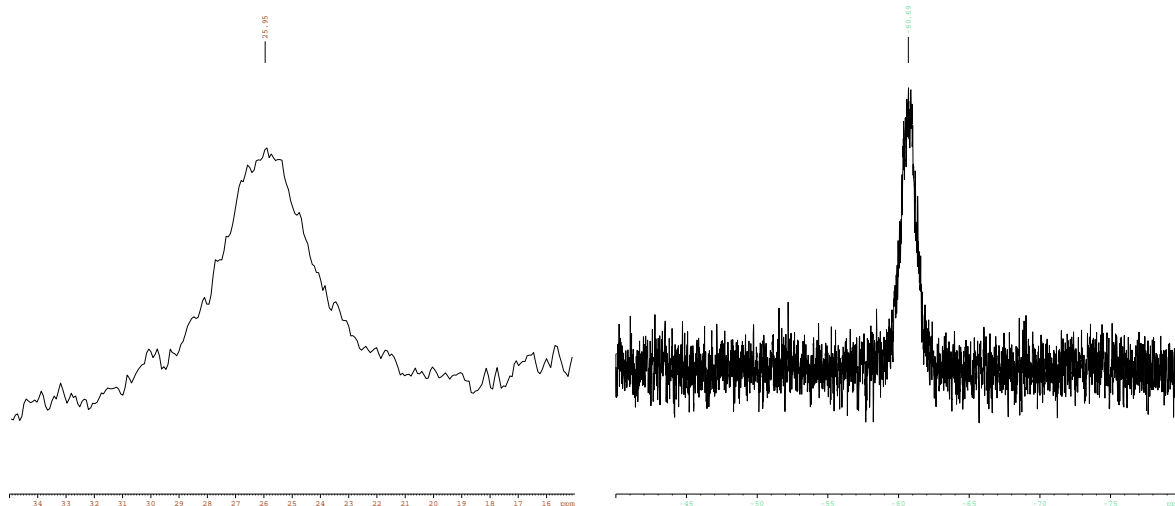

**Figure S4**  $^{11}\text{B}\{^1\text{H}\}$  (left) and  $^{31}\text{P}\{^1\text{H}\}$  NMR spectrum (right) of **4d**

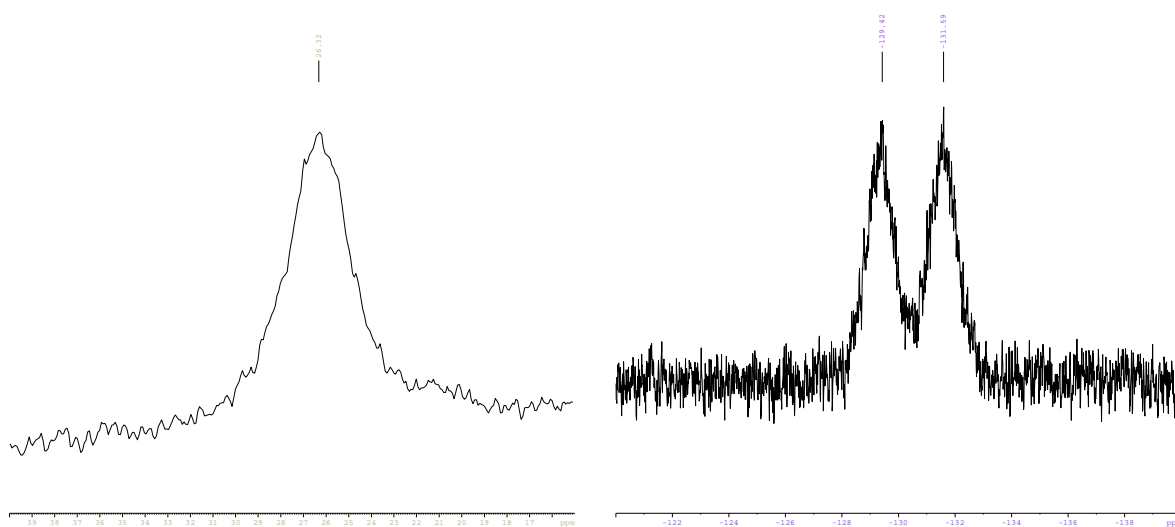

**Figure S5**  $^{11}\text{B}\{^1\text{H}\}$  (left) and  $^{31}\text{P}$  NMR spectrum (right) of **4e**

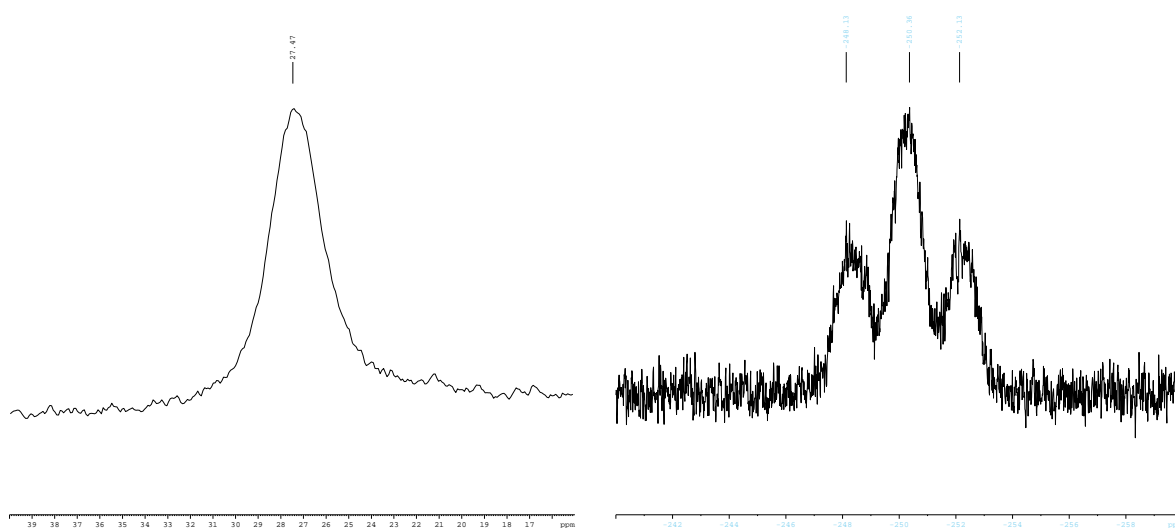

**Figure S6**  $^{11}\text{B}\{^1\text{H}\}$  (left) and  $^{31}\text{P}$  NMR spectrum (right) of **4f**

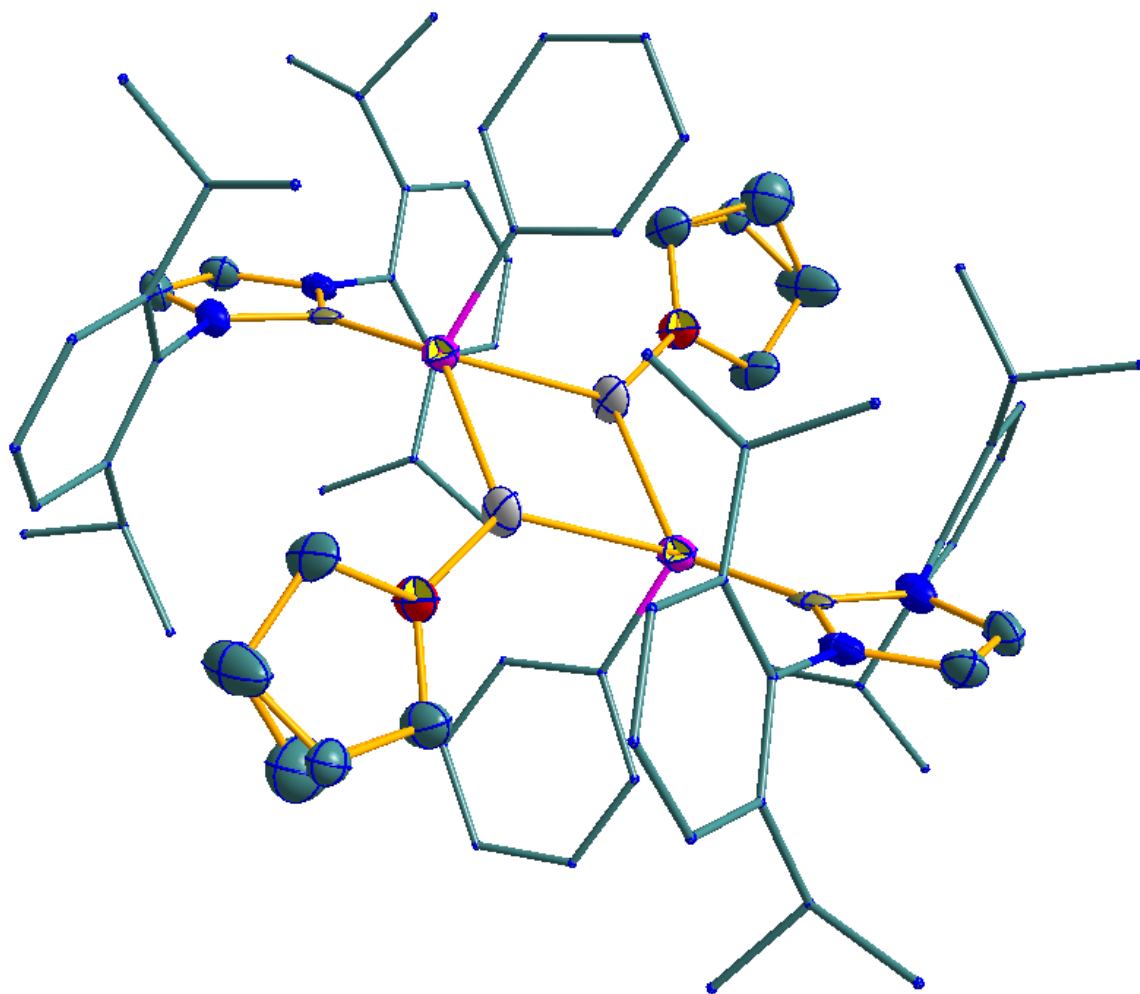

**Figure S7** Graphical representation of the molecular structure of **11** in the crystal (triclinic, space group  $P\bar{1}$ , cell parameters:  $a = 12.935(2)$  Å,  $b = 14.241(3)$  Å,  $c = 20.705(4)$  Å,  $\alpha = 93.713(8)^\circ$ ,  $\beta = 101.431(7)^\circ$ ,  $\gamma = 90.891(7)^\circ$ ) measured at 110(2) K. The two coordinating THF molecules are disordered.

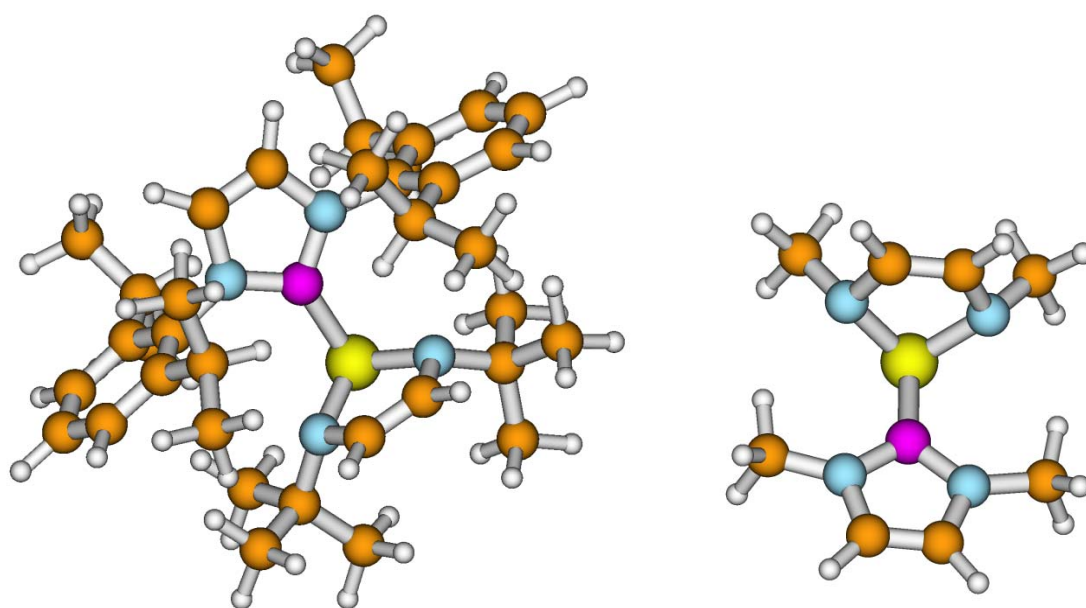

**Figure S8** Graphical representation of the computed molecular structures of **4b** (left) and **4'** (right) obtained after energy optimization at the  $\omega$ B97X-D/cc-pVDZ level.

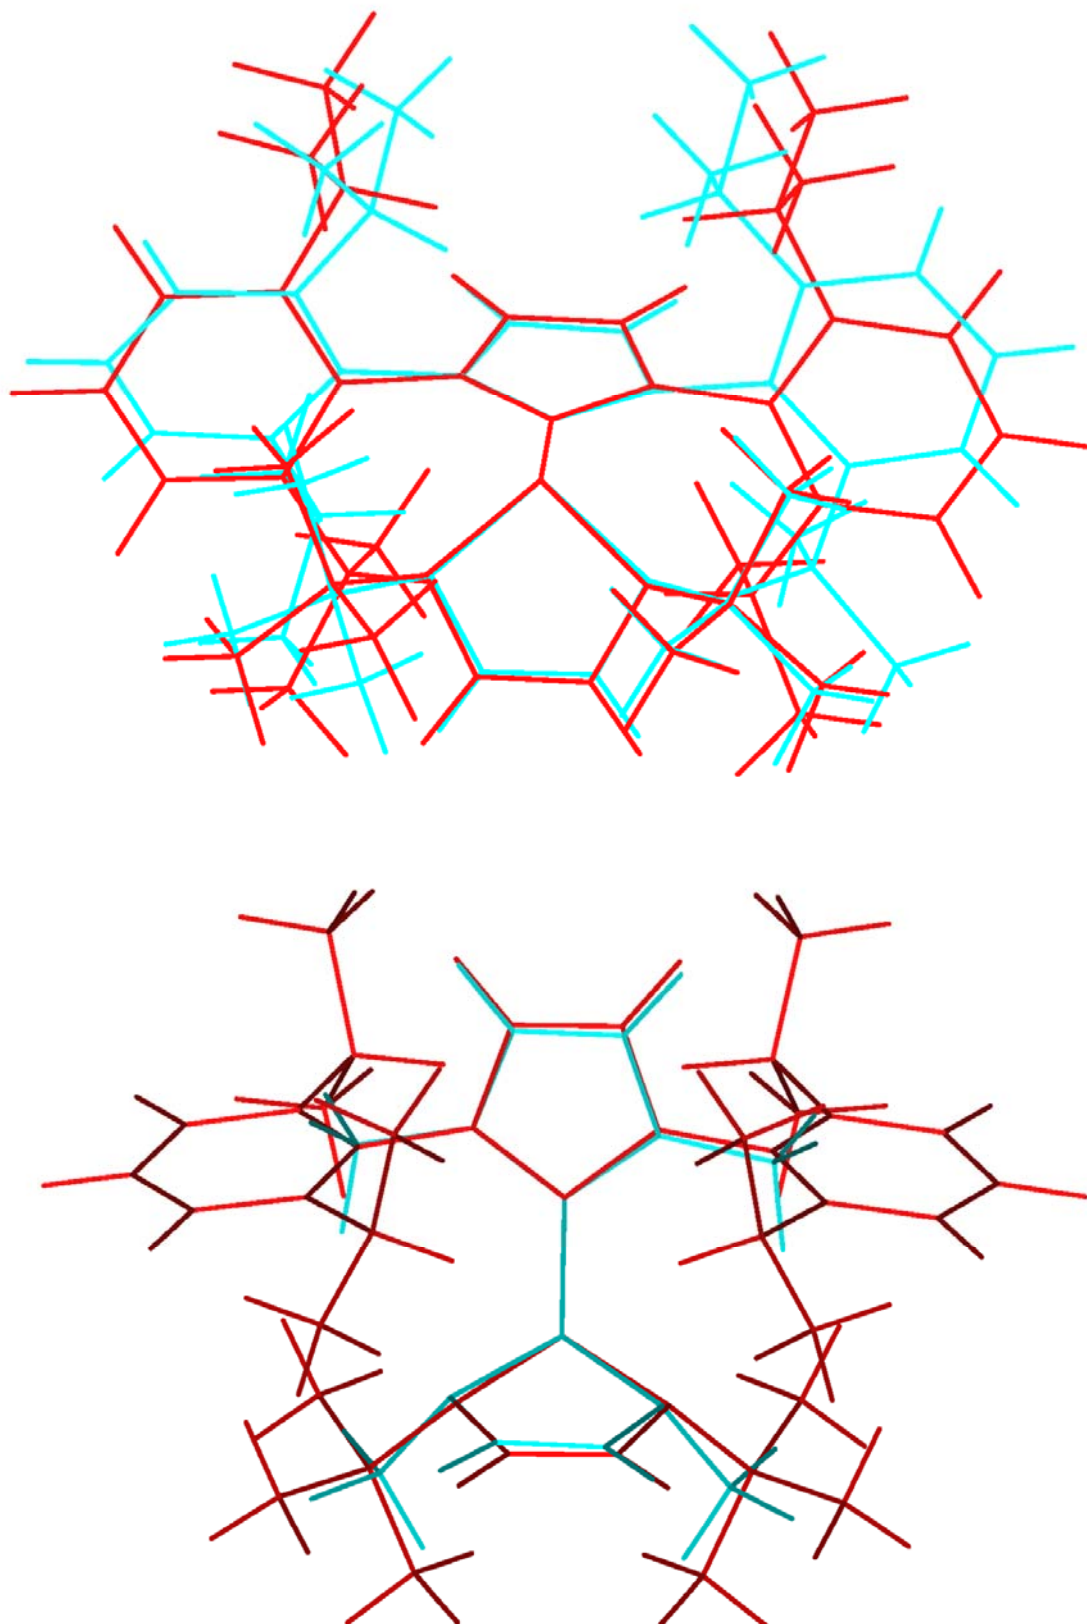

**Figure S9** Top: Overlay of the computed (red) and experimentally determined (blue) molecular structures of **4b** (top); bottom: overlay of the computed molecular structures of **4b** (red) and **4'** (blue). Computations were carried out at the  $\omega$ B97X-D/cc-pVDZ level.

**Table S1** Energy, vibrational zero-point energy, and atomic coordinates of the molecular structure of **4b** obtained after energy optimization at the  $\omega$ B97X-D/cc-pVDZ level.

E(R $\omega$ B97X-D) = -1990.49216614 A.U. after 1 cycles

Zero-point correction = 0.867381 (Hartree/Particle)

Standard orientation:

---

| Center No. | Atomic Number | Atomic Type | Coordinates (Angstroms) |           |           |
|------------|---------------|-------------|-------------------------|-----------|-----------|
|            |               |             | X                       | Y         | Z         |
| 1          | 5             | 0           | -0.000010               | 0.557012  | 0.188256  |
| 2          | 15            | 0           | 0.000010                | -0.818874 | -1.193994 |
| 3          | 7             | 0           | 1.302568                | -1.860452 | -0.592163 |
| 4          | 7             | 0           | -1.133588               | 1.285068  | 0.690288  |
| 5          | 7             | 0           | 1.133587                | 1.285087  | 0.690231  |
| 6          | 7             | 0           | -1.302557               | -1.860473 | -0.592208 |
| 7          | 6             | 0           | -3.172876               | 0.167892  | 1.444626  |
| 8          | 6             | 0           | -2.538015               | 1.065922  | 0.563037  |
| 9          | 6             | 0           | -3.251892               | 1.796909  | -0.399624 |
| 10         | 6             | 0           | -4.638362               | 1.618276  | -0.468202 |
| 11         | 6             | 0           | -5.284443               | 0.734571  | 0.385318  |
| 12         | 6             | 0           | -4.555725               | 0.016227  | 1.331207  |
| 13         | 6             | 0           | -0.674736               | 2.388328  | 1.414668  |
| 14         | 6             | 0           | 0.674752                | 2.388344  | 1.414626  |
| 15         | 6             | 0           | 2.538012                | 1.065916  | 0.563001  |
| 16         | 6             | 0           | 3.172863                | 0.167923  | 1.444635  |
| 17         | 6             | 0           | 4.555716                | 0.016264  | 1.331248  |
| 18         | 6             | 0           | 5.284447                | 0.734580  | 0.385348  |
| 19         | 6             | 0           | 4.638374                | 1.618246  | -0.468221 |
| 20         | 6             | 0           | 3.251901                | 1.796865  | -0.399681 |
| 21         | 6             | 0           | 2.376772                | -0.575376 | 2.508911  |
| 22         | 6             | 0           | 2.558316                | 2.775899  | -1.335438 |
| 23         | 6             | 0           | -2.558311               | 2.775979  | -1.335347 |
| 24         | 6             | 0           | -2.376787               | -0.575441 | 2.508880  |
| 25         | 6             | 0           | 0.671667                | -2.748921 | 0.314443  |
| 26         | 6             | 0           | -0.671682               | -2.748935 | 0.314410  |
| 27         | 6             | 0           | -2.341385               | -2.425766 | -1.503062 |
| 28         | 6             | 0           | -1.764248               | -3.482895 | -2.452108 |
| 29         | 6             | 0           | 2.341388                | -2.425779 | -1.503011 |
| 30         | 6             | 0           | 2.949577                | -1.280490 | -2.312670 |
| 31         | 6             | 0           | -3.452760               | -3.052624 | -0.652862 |

---

|    |   |   |           |           |           |
|----|---|---|-----------|-----------|-----------|
| 32 | 6 | 0 | -2.949549 | -1.280453 | -2.312706 |
| 33 | 6 | 0 | 3.452749  | -3.052639 | -0.652794 |
| 34 | 6 | 0 | 1.764237  | -3.482913 | -2.452041 |
| 35 | 1 | 0 | -1.365409 | 3.081681  | 1.885291  |
| 36 | 1 | 0 | 1.365437  | 3.081706  | 1.885219  |
| 37 | 1 | 0 | 1.277683  | -3.356516 | 0.986187  |
| 38 | 1 | 0 | -1.277714 | -3.356552 | 0.986121  |
| 39 | 1 | 0 | 5.079979  | -0.674040 | 1.993367  |
| 40 | 1 | 0 | 6.365827  | 0.601534  | 0.317201  |
| 41 | 1 | 0 | 5.218358  | 2.176937  | -1.205533 |
| 42 | 1 | 0 | 1.474205  | 2.634026  | -1.220378 |
| 43 | 6 | 0 | 2.880602  | 4.222568  | -0.940360 |
| 44 | 6 | 0 | 2.896963  | 2.518267  | -2.807203 |
| 45 | 6 | 0 | 3.012013  | -1.895356 | 2.949292  |
| 46 | 6 | 0 | 2.140070  | 0.315296  | 3.738013  |
| 47 | 1 | 0 | 1.396200  | -0.813439 | 2.070667  |
| 48 | 1 | 0 | -5.218335 | 2.176988  | -1.205508 |
| 49 | 1 | 0 | -6.365820 | 0.601512  | 0.317140  |
| 50 | 1 | 0 | -5.079996 | -0.674108 | 1.993289  |
| 51 | 6 | 0 | -2.896755 | 2.518211  | -2.807135 |
| 52 | 6 | 0 | -2.880818 | 4.222628  | -0.940385 |
| 53 | 1 | 0 | -1.474196 | 2.634249  | -1.220158 |
| 54 | 1 | 0 | -1.396223 | -0.813507 | 2.070620  |
| 55 | 6 | 0 | -2.140056 | 0.315204  | 3.737996  |
| 56 | 6 | 0 | -3.012040 | -1.895421 | 2.949242  |
| 57 | 1 | 0 | 3.735042  | -1.667332 | -2.979819 |
| 58 | 1 | 0 | 2.187179  | -0.792213 | -2.938692 |
| 59 | 1 | 0 | 3.395695  | -0.528534 | -1.647732 |
| 60 | 1 | 0 | 2.565569  | -3.953154 | -3.043269 |
| 61 | 1 | 0 | 1.241097  | -4.272082 | -1.890870 |
| 62 | 1 | 0 | 1.051602  | -3.026847 | -3.154106 |
| 63 | 1 | 0 | 4.261234  | -3.408248 | -1.309178 |
| 64 | 1 | 0 | 3.872080  | -2.306111 | 0.035329  |
| 65 | 1 | 0 | 3.098894  | -3.919351 | -0.074483 |
| 66 | 1 | 0 | -2.565583 | -3.953104 | -3.043357 |
| 67 | 1 | 0 | -1.051592 | -3.026832 | -3.154154 |
| 68 | 1 | 0 | -1.241134 | -4.272088 | -1.890948 |
| 69 | 1 | 0 | -3.735035 | -1.667266 | -2.979848 |
| 70 | 1 | 0 | -3.395635 | -0.528486 | -1.647759 |
| 71 | 1 | 0 | -2.187144 | -0.792198 | -2.938737 |
| 72 | 1 | 0 | -4.261260 | -3.408182 | -1.309255 |

|    |   |   |           |           |           |
|----|---|---|-----------|-----------|-----------|
| 73 | 1 | 0 | -3.098932 | -3.919370 | -0.074588 |
| 74 | 1 | 0 | -3.872062 | -2.306110 | 0.035293  |
| 75 | 1 | 0 | -2.309771 | -2.445123 | 3.594509  |
| 76 | 1 | 0 | -3.931146 | -1.735550 | 3.536299  |
| 77 | 1 | 0 | -3.261664 | -2.538638 | 2.094530  |
| 78 | 1 | 0 | -1.556437 | -0.229434 | 4.497148  |
| 79 | 1 | 0 | -1.584764 | 1.227434  | 3.482660  |
| 80 | 1 | 0 | -3.099885 | 0.610174  | 4.193306  |
| 81 | 1 | 0 | 2.309740  | -2.445043 | 3.594567  |
| 82 | 1 | 0 | 3.261631  | -2.538584 | 2.094588  |
| 83 | 1 | 0 | 3.931121  | -1.735485 | 3.536345  |
| 84 | 1 | 0 | 1.556449  | -0.229315 | 4.497182  |
| 85 | 1 | 0 | 3.099910  | 0.610257  | 4.193307  |
| 86 | 1 | 0 | 1.584793  | 1.227532  | 3.482665  |
| 87 | 1 | 0 | 2.323689  | 3.201714  | -3.452688 |
| 88 | 1 | 0 | 3.965398  | 2.684609  | -3.018957 |
| 89 | 1 | 0 | 2.649859  | 1.487537  | -3.097657 |
| 90 | 1 | 0 | 2.343973  | 4.931404  | -1.590337 |
| 91 | 1 | 0 | 2.588151  | 4.426501  | 0.100442  |
| 92 | 1 | 0 | 3.959763  | 4.427500  | -1.033402 |
| 93 | 1 | 0 | -2.344172 | 4.931493  | -1.590316 |
| 94 | 1 | 0 | -3.959987 | 4.427445  | -1.033590 |
| 95 | 1 | 0 | -2.588540 | 4.426638  | 0.100452  |
| 96 | 1 | 0 | -2.323554 | 3.201742  | -3.452597 |
| 97 | 1 | 0 | -2.649410 | 1.487516  | -3.097511 |
| 98 | 1 | 0 | -3.965204 | 2.684321  | -3.019001 |

---



Table S2: Energy, vibrational zero-point energy, and atomic coordinates of the molecular structure of **4'** obtained after energy optimization at the  $\omega$ B97X-D/cc-pVDZ level.

E(RwB97XD) = -899.580347466 A.U. after 1 cycles

Zero-point correction = 0.251474 Hartree/Particle

Standard orientation:

---

| Center No. | Atomic Number | Atomic Type | Coordinates (Angstroms) |           |           |
|------------|---------------|-------------|-------------------------|-----------|-----------|
|            |               |             | X                       | Y         | Z         |
| 1          | 5             | 0           | -1.022704               | 0.000000  | -0.250937 |
| 2          | 15            | 0           | 0.810458                | 0.000013  | -0.911287 |
| 3          | 7             | 0           | -1.868567               | 1.136935  | -0.041978 |
| 4          | 7             | 0           | -1.868556               | -1.136942 | -0.041966 |
| 5          | 7             | 0           | 1.457369                | 1.295777  | 0.115496  |
| 6          | 7             | 0           | 1.457373                | -1.295770 | 0.115469  |
| 7          | 6             | 0           | -1.585230               | 2.552539  | -0.140957 |
| 8          | 6             | 0           | -1.585207               | -2.552544 | -0.140932 |
| 9          | 6             | 0           | -3.142800               | 0.677082  | 0.277931  |
| 10         | 6             | 0           | -3.142793               | -0.677097 | 0.277937  |
| 11         | 6             | 0           | 1.786454                | 0.670572  | 1.349895  |
| 12         | 6             | 0           | 1.786460                | -0.670589 | 1.349879  |
| 13         | 6             | 0           | 2.515396                | -2.149575 | -0.421853 |
| 14         | 6             | 0           | 2.515398                | 2.149586  | -0.421809 |
| 15         | 1             | 0           | -0.499155               | 2.698532  | -0.166740 |
| 16         | 1             | 0           | -2.036232               | 2.992032  | -1.046192 |
| 17         | 1             | 0           | -1.980934               | 3.087928  | 0.736624  |
| 18         | 1             | 0           | -0.499131               | -2.698528 | -0.166705 |
| 19         | 1             | 0           | -1.980913               | -3.087930 | 0.736651  |
| 20         | 1             | 0           | -2.036199               | -2.992047 | -1.046165 |
| 21         | 1             | 0           | 2.748665                | -2.938877 | 0.311157  |
| 22         | 1             | 0           | 2.165990                | -2.636584 | -1.343308 |
| 23         | 1             | 0           | 3.451192                | -1.601503 | -0.645134 |
| 24         | 1             | 0           | 2.748610                | 2.938927  | 0.311178  |
| 25         | 1             | 0           | 3.451219                | 1.601528  | -0.645017 |
| 26         | 1             | 0           | 2.166024                | 2.636544  | -1.343302 |
| 27         | 1             | 0           | -3.959243               | -1.359761 | 0.499761  |
| 28         | 1             | 0           | -3.959256               | 1.359741  | 0.499746  |
| 29         | 1             | 0           | 2.023292                | 1.298824  | 2.210884  |
| 30         | 1             | 0           | 2.023307                | -1.298860 | 2.210853  |

---
